# Supplementary material
Source: HighWire-hosted journal article supplement (http://www.ajnr.org/highwire/filestream/52247/field_highwire_adjunct_files/0/2672_tables.pdf)
Supplement: 2672_tables.pdf [file 2672_tables.pdf]

| On-line Table 1: Clinical details of all the patients |        |                  |                  |                 |      |                               |
|-------------------------------------------------------|--------|------------------|------------------|-----------------|------|-------------------------------|
| Patient No.                                           | Gender | Age              | UPDRS            | H&Y             | MMSE | Medication                    |
| 1                                                     | M      | 48               | 25               | 1.5             | 30   | L-dopa, selegiline, pergolide |
| 2                                                     | F      | 51               | 26               | 1               | 30   | None                          |
| 3                                                     | F      | 52               | 27               | 2               | 30   | None                          |
| 4                                                     | F      | 72               | 20               | 1.5             | 30   | Pramipexole                   |
| 5                                                     | M      | 73               | 19               | 1               | 30   | L-dopa                        |
| 6                                                     | M      | 74               | 22               | 2               | 30   | L-dopa, cabergoline           |
| 7                                                     | M      | 81               | 27               | 1.5             | 30   | L-dopa, pramipexole           |
| 8                                                     | M      | 66               | 20               | 1               | 30   | Pramipexole                   |
| 9                                                     | F      | 62               | 18               | 1               | 30   | Pergolide, selegiline         |
| 10                                                    | F      | 61               | 19               | 1               | 30   | Pramipexole                   |
| 11                                                    | M      | 57               | 17               | 1               | 30   | L-dopa, selegiline, pergolide |
| 12                                                    | M      | 56               | 13               | 1               | 30   | Pramipexole                   |
| 13                                                    | F      | 65               | 15               | 1               | 30   | Pramipexole                   |
| 14                                                    | F      | 55               | 18               | 1               | 30   | None                          |
| 15                                                    | M      | 57               | 18               | 1               | 30   | None                          |
| 16                                                    | F      | 50               | 22               | 1               | 30   | L-dopa, cabergoline           |
| 17                                                    | M      | 68               | 20               | 1               | 30   | Pergolide, selegiline         |
| 18                                                    | F      | 64               | 24               | 1.5             | 30   | L-dopa, cabergoline           |
| 19                                                    | M      | 59               | 18               | 1               | 30   | None                          |
| 20                                                    | F      | 43               | 20               | 1               | 30   | Pramipexole                   |
| 21                                                    | F      | 56               | 24               | 1.5             | 30   | L-dopa                        |
| Mean $\pm$ SD                                         |        | 60.43 $\pm$ 9.65 | 20.17 $\pm$ 1.57 | 1.21 $\pm$ 0.34 | 30   |                               |

**Note:**—H&Y indicates Hoehn and Yahr Scale; MMSE, Mini-Mental State Examination.

| On-line Table 2: Hypoactive brain regions in PD group compared with control group |    |                       |     |    |              |         |
|-----------------------------------------------------------------------------------|----|-----------------------|-----|----|--------------|---------|
| Brain Region                                                                      | BA | Peak Voxel Coordinate |     |    | Cluster Size | t Score |
|                                                                                   |    | x                     | y   | z  |              |         |
| R. Primary somatosensory cortex                                                   | 1  | 54                    | -24 | 57 | 15           | 3.61    |
| L. Primary somatosensory cortex                                                   | 3  | -48                   | -27 | 63 | 6            | 3.54    |
| R. Supplementary motor area                                                       | 6  | 27                    | -6  | 63 | 8            | 3.42    |
| R. Premotor cortex                                                                | 6  | 24                    | -9  | 51 | 8            | 3.13    |
| R. Paracentral lobule                                                             | 5  | 21                    | -45 | 48 | 5            | 3.19    |

**Note:**—BA indicates Brodmann area.

| On-line Table 3: Hyperactive brain regions in PD group compared with control group |    |                       |     |     |              |         |
|------------------------------------------------------------------------------------|----|-----------------------|-----|-----|--------------|---------|
| Brain Region                                                                       | BA | Peak Voxel Coordinate |     |     | Cluster Size | t Score |
|                                                                                    |    | x                     | y   | z   |              |         |
| R. Dorsal lateral prefrontal cortex                                                | 46 | 54                    | 33  | 12  | 5            | 3.35    |
| L. Dorsal lateral prefrontal cortex                                                | 46 | -48                   | 21  | 24  | 8            | 3.30    |
| L. Inferior frontal gyrus                                                          | 45 | -54                   | 27  | 18  | 12           | 3.67    |
| L. Middle frontal gyrus                                                            | 10 | -42                   | 51  | 12  | 21           | 4.27    |
| L. Dorsal lateral prefrontal cortex                                                | 9  | -33                   | 39  | 33  | 22           | 3.38    |
| R. Parahippocampal gyrus                                                           | 19 | 42                    | -42 | 0   | 8            | 3.13    |
| L. Parahippocampal gyrus                                                           |    | -24                   | -15 | -12 | 7            | 3.05    |
| L. Posterior cerebellum                                                            |    | -18                   | -39 | -33 | 6            | 3.12    |
| L. Anterior cerebellum                                                             |    | -15                   | -45 | -15 | 7            | 3.31    |
| R. Posterior cerebellum                                                            |    | 15                    | -36 | -33 | 9            | 2.79    |
| R. Anterior cerebellum                                                             |    | 6                     | -36 | -33 | 9            | 3.29    |
| L. Caudate nucleus                                                                 |    | -15                   | 15  | 15  | 10           | 3.25    |
| L. Lentiform nucleus                                                               |    | -15                   | 9   | 6   | 6            | 3.02    |

**Note:**—BA indicates Brodmann area.
